# Supplementary material
Source: publisher figshare collection journal article supplement (https://karger.figshare.com/ndownloader/files/35905004)
Supplement: Supplementary file 1 [file 35905004]

Supplementary Table 1 - Top 50 miRs ranked by FDR adjusted p-values

| miRTarBase | TargetScan |
| --- | --- |
| miR-129-5p (Z-score 4.35, FDR 7.97E-10) | miR-142-3p (Z-score 2.46, FDR 6.65E-06) |
| miR-7977 (Z-score 3.94, FDR 1.22E-08) | miR-28-3p (Z-score 2.34, FDR 1.59E-05) |
| miR-6499 (Z-score 3.41, FDR 2.89E-08) | miR-720 (Z-score 2.58, FDR 6.33E-05) |
| miR-150-5p (Z-score 3.97, FDR 2.55E-07) | miR-4473 (Z-score 2.27, FDR 6.33E-05) |
| miR-186-3p (Z-score 4.25, FDR 2.77E-07) | miR-3613-5p* (Z-score 2.26, FDR 6.33E-05) |
| miR-1827 (Z-score 3.24, FDR 3.49E-07) | miR-4703-3p (Z-score 2.15, FDR 7.01E-05) |
| miR-4294 (Z-score 6.90, FDR 4.63E-07) | miR-3152-3p (Z-score 2.09, FDR 7.01E-05) |
| miR-6506-5p (Z-score 4.44, FDR 4.63E-07) | miR-3144-3p (Z-score 2.21, FDR 7.11E-05) |
| miR-383-3p (Z-score 4.28, FDR 4.63E-07) | miR-4454 (Z-score 3.01, FDR 9.47E-05) |
| miR-8055 (Z-score 4.88, FDR 15.25E-07) | miR-508-3p (Z-score 2.14, FDR 9.47E-05) |
| miR-431-5p (Z-score 7.11, FDR 5.97E-07) | miR-4529-3p (Z-score 2.09, FDR 9.47E-05) |
| miR-661 (Z-score 4.04, FDR 6.01-07) | miR-556-3p (Z-score 2.07, FDR 0.0001) |
| miR-6778-3p (Z-score 3.38, FDR 8.19E-07) | miR-1244 (Z-score 2.08, FDR 0.0001) |
| miR-6832-5p (Z-score 4.99, FDR 2.43E-06) | miR-4638-5p (Z-score 2.30, FDR 0.0001) |
| miR-1304-3p (Z-score 3.64, FDR 2.46E-06) | miR-1307 (Z-score 2.43, FDR 0.0001) |
| miR-1273g-3p* (Z-score 3.63, FDR 4.14E-06) | miR-875-5p (Z-score 2.10, FDR 0.0001) |
| miR-619-5p (Z-score 3.87, FDR 5.81E-06) | miR-770-5p (Z-score 2.01, FDR 0.0001) |
| miR-5698 (Z-score 3.57, FDR 8.53E-06) | miR-4712-5p (Z-score 2.01, FDR 0.0001) |
| miR-6849-3p (Z-score 3.03, FDR 1.03E-05) | miR-584 (Z-score 1.97, FDR 0.0002) |
| miR-106b-5p (Z-score 2.62, FDR 1.09E-05) | miR-4767 (Z-score 2.41, FDR 0.0006) |
| miR-4282 (Z-score 3.14, FDR 1.45E-05) | miR-3171 (Z-score 1.92, FDR 0.0007) |
| miR-455-3p (Z-score 2.90, FDR 1.57E-05) | miR-208b (Z-score 1.90, FDR 0.0008) |
| miR-511-3p (Z-score 4.60, FDR 1.77E-05) | miR-208a (Z-score 1.90, FDR 0.0008) |
| miR-4537 (Z-score 4.23, FDR 1.77E-05) | miR-468-3p (Z-score 1.86, FDR 0.0008) |
| miR-6512-5p (Z-score 3.37, FDR 1.77E-05) | miR-4671-3p (Z-score 1.95, FDR 0.001) |
| miR-6720-5p (Z-score 3.37, FDR 1.77E-05) | miR-3618 (Z-score 1.89, FDR 0.001) |
| miR-3689b-3p* (Z-score 3.06, FDR 1.77E-05) | miR-4759 (Z-score 1.88, FDR 0.001) |
| miR-3689a-3p (Z-score 3.06, FDR 1.77E-05) | miR-519e (Z-score 1.83, FDR 0.001) |
| miR-3689c-3p (Z-score 3.06, FDR 1.77E-05) | miR-515-3p (Z-score 1.83, FDR 0.001) |
| miR-1273hc-5p* (Z-score 3.06, FDR 1.77E-05) | miR-4520b-3p (Z-score 1.83, FDR 0.001) |
| miR-6780a-5p (Z-score 3.05, FDR 1.84E-05) | miR-4423-3p (Z-score 1.83, FDR 0.001) |
| miR-1910-3p (Z-score 3.38, FDR 2.06E-05) | miR-501-3p (Z-score 1.83, FDR 0.001) |
| miR-6747-3p (Z-score 3.38, FDR 2.06E-05) | miR-502-3p (Z-score 1.83, FDR 0.001) |
| miR-6779-5p (Z-score 3.01, FDR 2.06E-05) | miR-4704-5p (Z-score 1.83, FDR 0.001) |
| miR-30b-3p (Z-score 3.01, FDR 2.06E-05) | miR-921 (Z-score 1.81, FDR 0.001) |
| miR-6514-5p (Z-score 6.16, FDR 2.14E-05) | miR-564 (Z-score 2.01, FDR 0.001) |
| miR-6511a-5p (Z-score 3.35, FDR 2.14E-05) | miR-191 (Z-score 2.49, FDR 0.001) |
| miR-3613-3p* (Z-score 3.34, FDR 2.25E-05) | miR-1273* (Z-score 2.32, FDR 0.001) |
| miR-6799-5p (Z-score 2.96, FDR 2.65E-05) | miR-1281 (Z-score 2.01, FDR 0.001) |
| miR-122-5p (Z-score 3.08, FDR 2.66E-05) | miR-934 (Z-score 1.88, FDR 0.001) |
| miR-6086 (Z-score 3.21, FDR 2.70E-05) | miR-4715-5p (Z-score 1.85, FDR 0.001) |
| miR-512-3p (Z-score 3.21, FDR 2.70E-05) | miR-610 (Z-score 1.80, FDR 0.001) |
| miR-1277-5p (Z-score 3.00, FDR 3.98E-05) | miR-3689f (Z-score 1.79, FDR 0.001) |
| miR-4534 (Z-score 4.93, FDR 4.29E-05) | miR-3689b* (Z-score 1.79, FDR 0.001) |
| miR-6893-5p (Z-score 2.92, FDR 4.44E-05) | miR-3689e (Z-score 1.79, FDR 0.001) |
| miR-665 (Z-score 2.80, FDR 4.64E-05) | miR-3682-3p (Z-score 1.78, FDR 0.001) |
| miR-6808-5p (Z-score 2.91, FDR 4.68E-05) | miR-628-3p (Z-score 1.86, FDR 0.001) |
| miR-377-5p (Z-score 3.07, FDR 5.42E-05) | miR-4764-3p (Z-score 1.77, FDR 0.001) |
| miR-940 (Z-score 2.81, FDR 6.13E-05) | miR-3132 (Z-score 1.79, FDR 0.002) |

* common to both libraries.

Supplementary Table 2 - Overlapping genes

| miR-1273g-3p | KLLN, ISY1, RNASEH2B, CALCOCO2, PTEN, OTUD7B, TNFRSF13C*, THBS1, MYLK3, CLMP, DSEL, SIAE, MCF2L2, LAIR1, HSBP1, TAF13, TANGO2*, YIPF4, HAUS3*, PLEKHA3*, TTC39C, HINFP, SMU1, TIMM10B, SLC25A16, AGO3, RPL7L1, CNKSR3, PXMP4 |
| --- | --- |
| miR-1273h-5p | KLLN, PIGR, TRIM72, ATL3, PHAX*, TNFRSF13C*, TIMM50*, TIAL1, SENP5*, DSEL, OPA3, CSTF1, PLCE1, KAT7, MCF2L2, PDZD8, FEM1A, MMAB, TANGO2*, MRPS23, FNDC3B, HAUS3, HOOK3, MARCH6, PGM2L1, TPCN2, TOX4, RPL7L1, KIAA1456*, DNAJC10, TRIM13, GPRC5C |
| miR-1273 | PIGR, ZBTB8A, SPG7, AKAP5, SLC2A4, LPP, CDH6, MRPL42, ADGRE2, C16ORF72, SHOX, MCF2L2, PKNOX2, SLC30A7*, MKL2, TRIM41, MYO10*, LRRC27, HOOK3*, BTBD9, BACE1, PAN3, KIAA1456*, TRIM13*, PLEKHM1, PPARA, CHST5 |
| miR-3689b-3p | KLLN, PIGR, TRIM72, ATL3, PHAX*, TNFRSF13C*, TIMM50*, TIAL1, SENP5*, DSEL, OPA3, CSTF1, PLCE1, KAT7, MCF2L2, PDZD8, FEM1A, MMAB, TANGO2*, MRPS23, FNDC3B, HAUS3*, HOOK3*, MARCH6, PGM2L1, TPCN2, TOX4, RPL7L1, KIAA1456*, DNAJC10, TRIM13*, GPRC5C |
| miR-3689b | ERO1A, WIPF2, ZBTB20, SENP7, RPS6KA6, CCDC91, SENP5*, ALDH2, LRAT, ZNF562, SLC30A7*, MKL2, EMX2, DIS3, DNMT3A, FNDC3B, HLA-F, FAM126A, PGM2L1, FOXP1, BACE1, TOX4, RNF168, PIGB, KIAA1456*, SGK3, PPARA*, ZBTB8A, CAB39, SDC3, GPR85, NEDD4L, NEDD9, CACNA1D, AKAP5, CLN8, LPP, PLAC8, CAND1, DSEL, KCNJ3, ZNF382, APOOL, MYO10*, BCDIN3D, PLEKHA3*, SYT14, PHC3, PTPN14, GPR137C, MAVS, STAG2, ERCC4, TRIM33 |
| miR-3613-3p | DDX6, WNT2B, WIPF2, ATP5A1, GPR85, PHAX*, TNFRSF13C*, CLN8, SKA1, PRRG3, PARD6B, ATP6V0A2, CCNL1, ZNF562, FEM1A, HSPA4, TAF13, TANGO2*, HAUS3*, PLEKHA3*, ZNF99, HOOK3*, HINFP, MAVS, DPPA4, CD47, HSPA1B |
| miR-3613-5p | ISY1, GMFB, WIPF2, PTEN, LCLAT1, TTC28, RPS6KA6, SENP5*, LRAT, ARIH1, ZNF562, SLC30A7*, DNMT3A, SOX11, EMP2, FAM126A, FOXP1, EML6, THAP6, HEATR5A, KIAA1456*, CNKSR3, TRIM13*, PPARA*, GPLD1, STAU2, AKAP5, LPAR4, LPP, TIMM50*, PLAC8, ATXN3, PARD6B, FAM124A, CLMP, FLRT2, ZNF626, ATP6V0A2, RPP14, SAMD3, KCNJ2, APOOL, MYO10*, MMAB, BCDIN3D, SYT14, PHC3, TIMM10B, MAVS, ERCC4, ETNK1, TACC1, HSPA1B, TRIM33 |

*common to all three miRs
